# Supplementary material
Source: PubMed Central journal article supplement (PMC9710469)

## **Supplementary Materials**

- 1. Supplementary Table 1. Participating Centers and Principal Investigators**
- 2. Supplementary Table 2. BMT CTN Infection Severity Grading**
- 3. Supplementary Table 3. Treatment Emergent Adverse Events**
- 4. Supplementary Table 4. Treatment Emergent Adverse Events Related to Cord Blood Infusion**
- 5. Supplementary Figure 1. Quantitative recovery (median cells/ $\mu$ l) of (A) CD3+, (B) CD4+, (C) CD8+, (D) CD19+ and (E) CD56+ CD16+ NK cells.**

**Supplementary Table 1. Participating centers and principal investigators**

| <b>Country</b>                  | <b>Site</b>                                   | <b>Principal Investigator</b> |
|---------------------------------|-----------------------------------------------|-------------------------------|
| <b>All countries</b>            | <b>All sites</b>                              |                               |
| <b>United States of America</b> | <b>All</b>                                    |                               |
|                                 | Duke University Medical Center                | Mitchell Horwitz              |
|                                 | Loyola University Medical Center              | Patrick Stiff                 |
|                                 | Dana Farber Cancer Institute                  | Corey Cutler                  |
|                                 | University of Minnesota                       | Claudio Brunstein             |
|                                 | Cleveland Clinic                              | Rabi Hanna                    |
|                                 | Oregon Health and Science University          | Richard Maziarz               |
|                                 | Stanford University Cancer Institute          | Andrew Rezvani                |
|                                 | City of Hope Comprehensive Cancer Center      | Nicole Karras                 |
|                                 | Kansas Medical Center                         | Joseph McGuirk                |
|                                 | University of California at Los Angeles       | Gary Schiller                 |
|                                 | Boston Children's Hospital                    | Christine Duncan              |
|                                 | Denver Children's Hospital                    | Amy Keating                   |
|                                 | Methodist University Hospital (Tennessee)     | Yasser Khaled                 |
|                                 | Northwestern University                       | Olga Frankfurt                |
|                                 | Children's Medical Center of Dallas           | Victor Aquino                 |
|                                 | Duke University Medical Center Pediatrics     | Joanne Kurtzberg              |
|                                 | Henry Ford Medical Center                     | Edward Peres                  |
|                                 | Rutgers Cancer Institute of New Jersey        | Dennis Cooper                 |
|                                 | University of Virginia                        | Leonid Volodin                |
| <b>Spain</b>                    | <b>All</b>                                    |                               |
|                                 | Hospital Universitario La Fe                  | Guillermo Sanz                |
|                                 | University Hospital Vall d'Hebron             | David Valcarcel               |
|                                 | Hospital Sant Pau                             | Isabel Badell                 |
| <b>Singapore</b>                | <b>All</b>                                    |                               |
|                                 | Singapore General Hospital                    | William Hwang                 |
|                                 | National University Hospital                  | Liang Pui Koh                 |
| <b>Netherlands</b>              | <b>All</b>                                    |                               |
|                                 | Princess Maxima Center for Pediatric Oncology | Caroline Lindemans            |

|                       |                                            |                    |
|-----------------------|--------------------------------------------|--------------------|
|                       | Utrecht University                         | Caroline Lindemans |
| <b>Brazil</b>         | <b>All</b>                                 |                    |
|                       | Hospital Israelita Albert Einstein         | Nelson Hamerschlak |
|                       | Hospital do Cancer de Sao Paulo Adults     | Vanderson Rocha    |
|                       | Hospital do Cancer de Sao Paulo Pediatrics | Juliana Folloni    |
| <b>Israel</b>         | <b>All</b>                                 |                    |
|                       | Rabin Medical Center                       | Ron Ram            |
|                       | Tel Aviv Sourasky Medical Center Adults    | Moshe Yeshurun     |
| <b>United Kingdom</b> | <b>All</b>                                 |                    |
|                       | Manchester University Hospital             | Robert Wynn        |
|                       | The Royal Marsden Hospital                 | Emma Nicholson     |

## Supplementary Table 2. BMT CTN Infection Severity Grading

BMT CTN

Technical MOP  
Version 3.0 dated March 19, 2013

### APPENDIX 4-A

#### SEVERITY GRADING TABLE AND RECURRENCE INTERVAL DEFINITIONS

| Type of Infection/<br>Severity Grade | Grade 1                                                                                                                                                                                                                                                                                                                                                                                                   | Grade 2                                                                                                                                                                                                                                                                                                                                                                                                                                                                                                                                                    | Grade 3                                                                                                                                                                                                                                                                                                                                                                                                    |
|--------------------------------------|-----------------------------------------------------------------------------------------------------------------------------------------------------------------------------------------------------------------------------------------------------------------------------------------------------------------------------------------------------------------------------------------------------------|------------------------------------------------------------------------------------------------------------------------------------------------------------------------------------------------------------------------------------------------------------------------------------------------------------------------------------------------------------------------------------------------------------------------------------------------------------------------------------------------------------------------------------------------------------|------------------------------------------------------------------------------------------------------------------------------------------------------------------------------------------------------------------------------------------------------------------------------------------------------------------------------------------------------------------------------------------------------------|
| <b>Bacterial infections</b>          | <p>Bacterial focus NOS requiring no more than 14 days of therapy for treatment (e.g. urinary tract infection)</p> <p>Coag Neg Staph (<i>S. epi</i>), <i>Corynebacterium</i>, or <i>Propionibacterium</i> bacteremia</p> <p>Cellulitis responding to initial therapy within 14 days</p> <p><i>C. Difficile</i> toxin positive stool with diarrhea &lt; 1L without abdominal pain (child &lt; 20 mL/kg)</p> | <p>Bacteremia (except CoNS) without severe sepsis ***</p> <p>Bacterial focus with persistent signs, symptoms or persistent positive cultures requiring greater than 14 days of therapy</p> <p>Cellulitis requiring a change in therapy d/t progression<br/>Localized or diffuse infections requiring incision with or without drain placement</p> <p>Any pneumonia documented or presumed to be bacterial</p> <p><i>C. Difficile</i> toxin positive stool with diarrhea <math>\geq</math> 1L (child <math>\geq</math> 20 mL/kg) or with abdominal pain</p> | <p>Bacteremia with deep organ involvement (e.g. with new or worsening pulmonary infiltrates; endocarditis)</p> <p>Severe sepsis with bacteremia.</p> <p>Fasciitis requiring debridement</p> <p>Pneumonia requiring intubation</p> <p>Brain abscess or meningitis without bacteremia</p> <p><i>C. Difficile</i> toxin positive stool with toxic dilatation or renal insufficiency with/without diarrhea</p> |
| <b>Fungal infections</b>             | <p>Superficial candida infection (e.g. oral thrush, vaginal candidiasis)</p>                                                                                                                                                                                                                                                                                                                              | <p><i>Candida</i> esophagitis (biopsy proven).</p> <p>Proven or probable fungal sinusitis confirmed radiologically without orbital, brain or bone involvement.</p>                                                                                                                                                                                                                                                                                                                                                                                         | <p>Fungemia including Candidemia</p> <p>Proven or probable invasive fungal infections (e.g., <i>Aspergillus</i>, <i>Mucor</i>, <i>Fusarium</i>, <i>Scedosporium</i>).</p>                                                                                                                                                                                                                                  |

| Type of Infection/<br>Severity Grade | Grade 1                                                                                                                                                                                                                                                                                                                                                                                                                                                                                                                                                                                | Grade 2                                                                                                                                                                                                                                                                                                                                                                                                                                                                                                                                                                                                                                              | Grade 3                                                                                                                                                                                                                                                                |
|--------------------------------------|----------------------------------------------------------------------------------------------------------------------------------------------------------------------------------------------------------------------------------------------------------------------------------------------------------------------------------------------------------------------------------------------------------------------------------------------------------------------------------------------------------------------------------------------------------------------------------------|------------------------------------------------------------------------------------------------------------------------------------------------------------------------------------------------------------------------------------------------------------------------------------------------------------------------------------------------------------------------------------------------------------------------------------------------------------------------------------------------------------------------------------------------------------------------------------------------------------------------------------------------------|------------------------------------------------------------------------------------------------------------------------------------------------------------------------------------------------------------------------------------------------------------------------|
| Fungal infections<br>continued       |                                                                                                                                                                                                                                                                                                                                                                                                                                                                                                                                                                                        |                                                                                                                                                                                                                                                                                                                                                                                                                                                                                                                                                                                                                                                      | Disseminated infections (defined as multifocal pneumonia, presence of urinary or blood antigen, and/or CNS involvement) with Histoplasmosis, Blastomycosis, Coccidiomycosis, or Cryptococcus.<br><br><i>Pneumocystis jiroveci</i> pneumonia (regardless of PaO2 level) |
| Viral infections                     | Mucous HSV infection<br><br>Dermatomal Zoster<br><br>Asymptomatic CMV viremia untreated or a CMV viremia with viral load decline by at least 2/3 of the baseline value after 2 weeks of therapy<br><br>EBV reactivation not treated with rituximab<br><br>Adenoviral conjunctivitis asymptomatic viruria, asymptomatic stool shedding and viremia not requiring treatment<br><br>Asymptomatic HHV-6 viremia untreated or an HHV-6 viremia with a viral load decline by at least 0.5 log after 2 weeks of therapy<br><br>BK viremia or viruria with cystitis not requiring intervention | VZV infection with 3 or more dermatomes<br><br>Clinically active CMV infection (e.g. symptoms, cytopenias) or CMV Viremia not decreasing by at least 2/3 of the baseline value after 2 weeks of therapy<br><br>EBV reactivation requiring institution of therapy with rituximab<br><br>Adenoviral upper respiratory infection, viremia, or symptomatic viruria requiring treatment<br><br>Clinically active HHV-6 infection (e.g. symptoms, cytopenias) or HHV-6 viremia without viral load decline 0.5 log after 2 weeks of therapy<br><br>BK viremia or viruria with clinical consequence requiring prolonged therapy and/or surgical intervention | Severe VZV infection (coagulopathy or organ involvement)<br><br>CMV end-organ involvement (pneumonitis, enteritis, retinitis)<br><br>EBV PTLD<br><br>Adenovirus with end-organ involvement (except conjunctivitis and upper respiratory tract)                         |

| Type of Infection/<br>Severity Grade           | Grade 1                                                                                                                                        | Grade 2                                                                                                                                                  | Grade 3                                                                                                         |
|------------------------------------------------|------------------------------------------------------------------------------------------------------------------------------------------------|----------------------------------------------------------------------------------------------------------------------------------------------------------|-----------------------------------------------------------------------------------------------------------------|
| <b>Viral infections continued</b>              | Viremia (virus not otherwise specified) not requiring therapy                                                                                  | Enterocolitis with enteric viruses<br><br>Symptomatic upper tract respiratory virus<br><br>Any viremia (virus not otherwise specified) requiring therapy | Lower tract respiratory viruses<br><br><br><br>Any viral encephalitis or meningitis                             |
| <b>Parasitic infections</b>                    |                                                                                                                                                |                                                                                                                                                          | CNS or other organ toxoplasmosis<br><br>Strongyloides hyperinfection                                            |
| <b>Nonmicrobiologically defined infections</b> | Uncomplicated fever with negative cultures responding within 14 days<br><br>Clinically documented infection not requiring inpatient management | Pneumonia or bronchopneumonia not requiring mechanical ventilation<br><br>Typhlitis                                                                      | Any acute pneumonia requiring mechanical ventilation<br><br><br>Severe sepsis*** without an identified organism |

\*Concomitant or multimicrobial infections are graded according to the grade of the infection with the higher grade of severity.

\*\*Therapy includes both PO and IV formulations

\*\*\*Severe Sepsis:

Adults:

*Hypotension*

-A systolic blood pressure of <90 mm Hg or a reduction of >40 mm hg from baseline in the absence of other causes for hypotension

*Multiple Organ Dysfunction Syndrome*

-2 or more of the following: Renal failure requiring dialysis, respiratory failure requiring bipap or intubation, heart failure requiring pressors, liver failure

**Supplementary Table 3. Treatment Emergent Adverse Events with Severity Grades 3-5\***

| MedDRA Preferred Term<br>by System Organ Class              | Treatment Received        |      |                             |      |
|-------------------------------------------------------------|---------------------------|------|-----------------------------|------|
|                                                             | Omidubicel<br>(N=52)      |      | Unmanipulated UCB<br>(N=56) |      |
|                                                             | Number of<br>Participants | %    | Number of<br>Participants   | %    |
| <b>Blood and lymphatic system disorders</b>                 |                           |      |                             |      |
| Febrile neutropenia                                         | 3                         | 5.8  | 4                           | 7.1  |
| Thrombotic microangiopathy                                  | 1                         | 1.9  | 3                           | 5.4  |
| <b>Gastrointestinal disorders</b>                           |                           |      |                             |      |
| Diarrhea                                                    | 1                         | 1.9  | 3                           | 5.4  |
| Dysphagia                                                   | 6                         | 11.5 | 7                           | 12.5 |
| Gastrointestinal toxicity                                   | 10                        | 19.2 | 19                          | 33.9 |
| Vomiting                                                    | 3                         | 5.8  | 2                           | 3.6  |
| <b>General disorders and administration site conditions</b> |                           |      |                             |      |
| Asthenia                                                    | 2                         | 3.8  | 11                          | 19.6 |
| Mucosal inflammation                                        | 16                        | 30.8 | 19                          | 33.9 |
| Oedema                                                      | 1                         | 1.9  | 4                           | 7.1  |
| Pain                                                        | 17                        | 32.7 | 10                          | 17.9 |
| Pyrexia                                                     | 1                         | 1.9  | 6                           | 10.7 |
| <b>Hepatobiliary disorders</b>                              |                           |      |                             |      |
| Venooclusive liver disease                                  | 2                         | 3.8  | 4                           | 7.1  |
| <b>Infections and infestations</b>                          |                           |      |                             |      |
| Cystitis                                                    | 4                         | 7.7  | 2                           | 3.6  |
| Human herpesvirus 6 infection                               | 4                         | 7.7  | 0                           | 0.0  |
| Pneumonia                                                   | 4                         | 7.7  | 5                           | 8.9  |
| Sepsis                                                      | 3                         | 5.8  | 1                           | 1.8  |
| Septic shock                                                | 1                         | 1.9  | 7                           | 12.5 |
| <b>Injury, poisoning and procedural complications</b>       |                           |      |                             |      |

| MedDRA Preferred Term<br>by System Organ Class                             | Treatment Received        |      |                             |      |
|----------------------------------------------------------------------------|---------------------------|------|-----------------------------|------|
|                                                                            | Omidubicel<br>(N=52)      |      | Unmanipulated UCB<br>(N=56) |      |
|                                                                            | Number of<br>Participants | %    | Number of<br>Participants   | %    |
| Transplant failure                                                         | 3                         | 5.8  | 5                           | 8.9  |
| <b>Investigations</b>                                                      |                           |      |                             |      |
| Transaminases increased                                                    | 4                         | 7.7  | 1                           | 1.8  |
| <b>Metabolism and nutrition disorders</b>                                  |                           |      |                             |      |
| Dehydration                                                                | 3                         | 5.8  | 2                           | 3.6  |
| Hyperglycaemia                                                             | 4                         | 7.7  | 8                           | 14.3 |
| Hypoalbuminaemia                                                           | 1                         | 1.9  | 3                           | 5.4  |
| Hypocalcaemia                                                              | 1                         | 1.9  | 3                           | 5.4  |
| Hypokalaemia                                                               | 6                         | 11.5 | 5                           | 8.9  |
| Hypophosphataemia                                                          | 3                         | 5.8  | 5                           | 8.9  |
| <b>Neoplasms benign, malignant and unspecified (incl cysts and polyps)</b> |                           |      |                             |      |
| Leukemia recurrent                                                         | 4                         | 7.7  | 5                           | 8.9  |
| <b>Nervous system disorders</b>                                            |                           |      |                             |      |
| Syncope                                                                    | 3                         | 5.8  | 2                           | 3.6  |
| <b>Psychiatric disorders</b>                                               |                           |      |                             |      |
| Anxiety                                                                    | 1                         | 1.9  | 3                           | 5.4  |
| <b>Renal and urinary disorders</b>                                         |                           |      |                             |      |
| Acute kidney injury                                                        | 4                         | 7.7  | 3                           | 5.4  |
| <b>Respiratory, thoracic and mediastinal disorders</b>                     |                           |      |                             |      |
| Dyspnoea                                                                   | 4                         | 7.7  | 9                           | 16.1 |
| Epistaxis                                                                  | 3                         | 5.8  | 4                           | 7.1  |
| Hypoxia                                                                    | 5                         | 9.6  | 13                          | 23.2 |



|                                                | Treatment Received        |      |                             |      |
|------------------------------------------------|---------------------------|------|-----------------------------|------|
|                                                | Omidubicel<br>(N=52)      |      | Unmanipulated UCB<br>(N=56) |      |
| MedDRA Preferred Term<br>by System Organ Class | Number of<br>Participants | %    | Number of<br>Participants   | %    |
| Respiratory failure                            | 2                         | 3.8  | 5                           | 8.9  |
| <b>Vascular disorders</b>                      |                           |      |                             |      |
| Hypertension                                   | 13                        | 25.0 | 22                          | 39.3 |
| Hypotension                                    | 2                         | 3.8  | 5                           | 8.9  |

\*reported in at least 3% of the safety (as-treated) population

**Supplemental Table 4: Treatment Emergent Adverse Events Related to Cord Blood Infusion**

| <b>Event</b>              | <b>Treatment Received</b>    |                                         |
|---------------------------|------------------------------|-----------------------------------------|
|                           | <b>Omidubicel<br/>(N=52)</b> | <b>Unmanipulated<br/>UCB<br/>(N=56)</b> |
| Graft versus host disease | 18 (35%)                     | 14 (25%)                                |
| Pain                      | 4 (8%)                       | 1 (2%)                                  |
| Hypertension              | 2 (4%)                       | 10 (18%)                                |
| Transplant failure        | 2 (4%)                       | 5 (9%)                                  |
| Dyspnea                   | 1 (2%)                       | 4 (7%)                                  |

**Supplementary Figure 1. Quantitative recovery (median cells/ $\mu$ l) of (A) CD3+, (B) CD4+, (C) CD8+, (D) CD19+ and (E) CD56+ CD16+ NK cells**

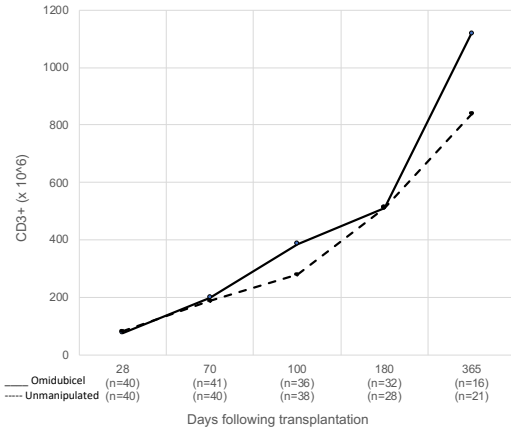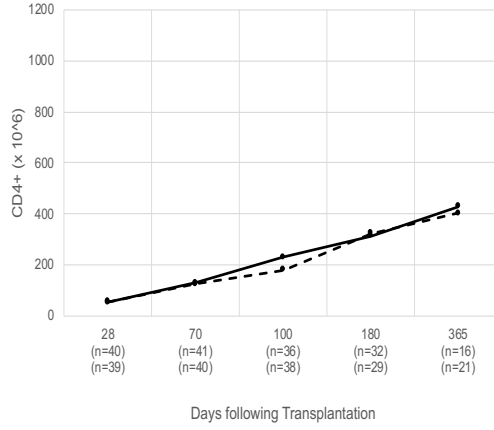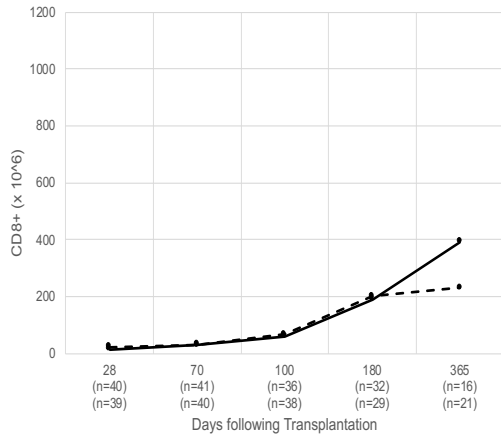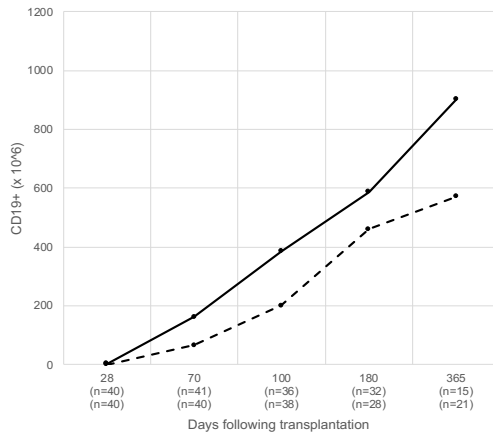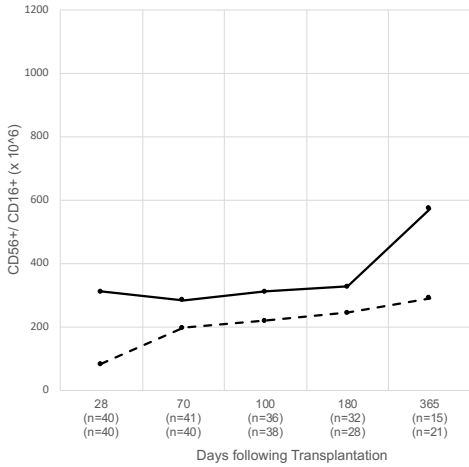

Supplement: mmc1.pdf [file mmc1.pdf]
